# Supplementary material for: Chemical interaction and enhanced interfacial ion transport in a ceramic nanofiber–polymer composite electrolyte for all-solid-state lithium metal batteries
Source: Royal Society of Chemistry journal article supplement (doi:10.1039/c9ta12495k), 2020-01-01
Supplement: c9ta12495k1.pdf [file c9ta12495k1.pdf]

Supporting Information

**Chemical Interaction and Enhanced Interfacial Ion Transport in  
Ceramic Nanofiber-Polymer Composite Electrolyte for All-Solid-  
State Lithium Metal Battery**

*Hui Yang<sup>1</sup>, Joeseeph Bright<sup>1</sup>, Banghao Chen<sup>2</sup>, Peng Zheng<sup>1</sup>, Xuefei Gao<sup>1</sup>, Botong Liu<sup>1</sup>, Sujan*

*Kasani<sup>1</sup>, Xiangwu Zhang<sup>3</sup>, and Nianqiang Wu<sup>1,4,\*,#</sup>*

<sup>1</sup>Department of Mechanical and Aerospace Engineering, West Virginia University, Morgantown, WV 26506-6106, United States

<sup>2</sup>Chem & BioChem Department, Florida State University, Tallahassee, Florida, 32306, USA

<sup>3</sup>Fiber and Polymer Science Program, Department of Textile Engineering, Chemistry and Science, Wilson College of Textiles, North Carolina State University, Raleigh, NC 27695-8301, United States

<sup>4</sup>C. Eugene Bennett Department of Chemistry, West Virginia University, Morgantown, WV 26506-6045, USA

\*To whom the correspondence should be addressed. Tel: +1-413-545-6175, E-mail: nianqiangwu@umass.edu

*#Current address: Department of Chemical Engineering, University of Massachusetts Amherst, Amherst, MA 01003-9303, United States*

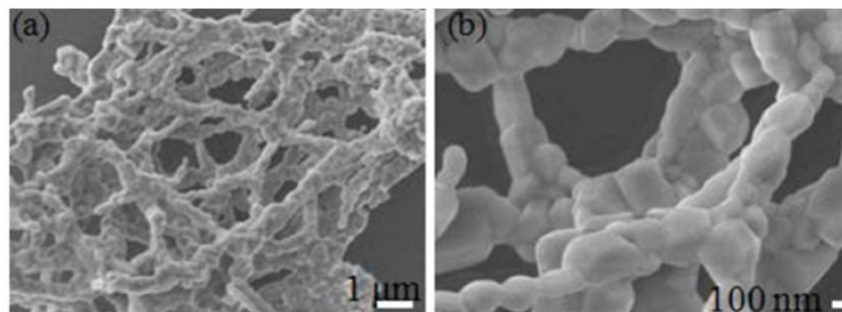

After calcination at 1000 °C

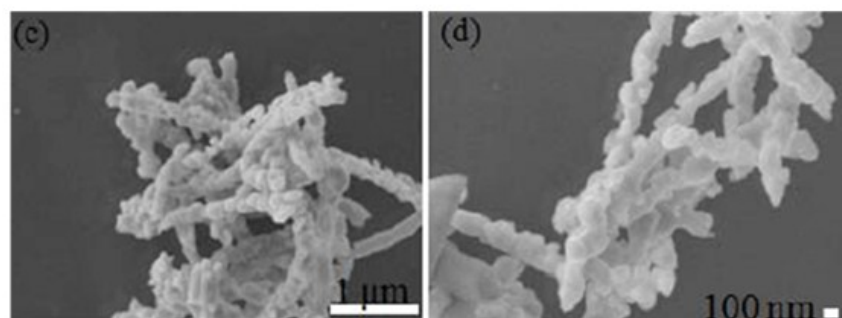

After calcination at 900 °C

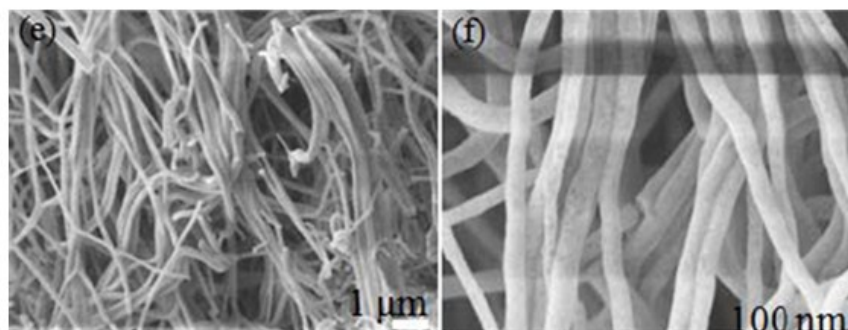

After calcination at 800 °C

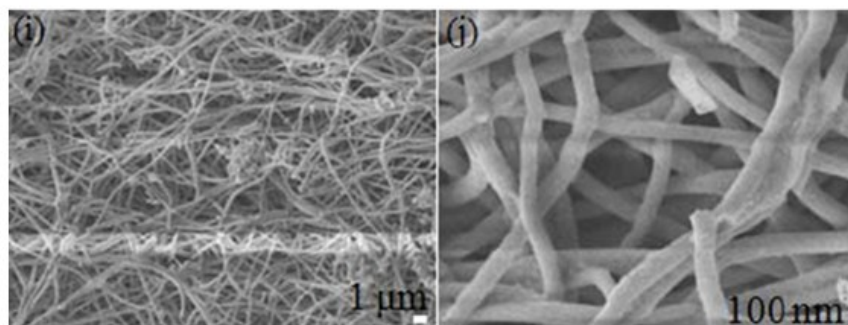

After calcination at 700 °C

**Figure S1.** SEM images of the LLTO nanofibers after calcination at different temperatures

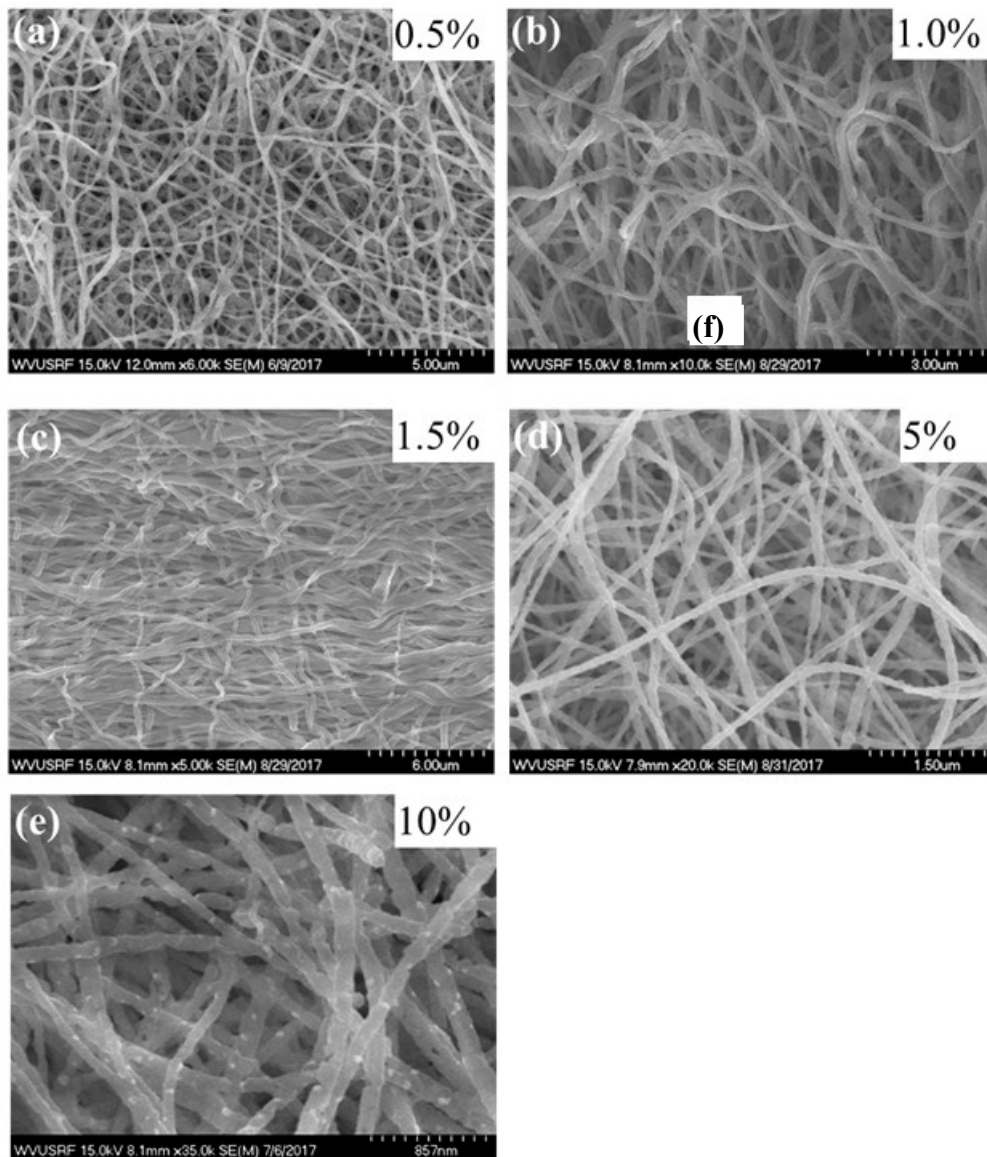

**Figure S2.** SEM images of Al-doped LLTO nanofibers. (a) LLATO, (b) LLATO-1, (c) LLATO-2, (d) LLATO-3, and (e) LLATO-4.

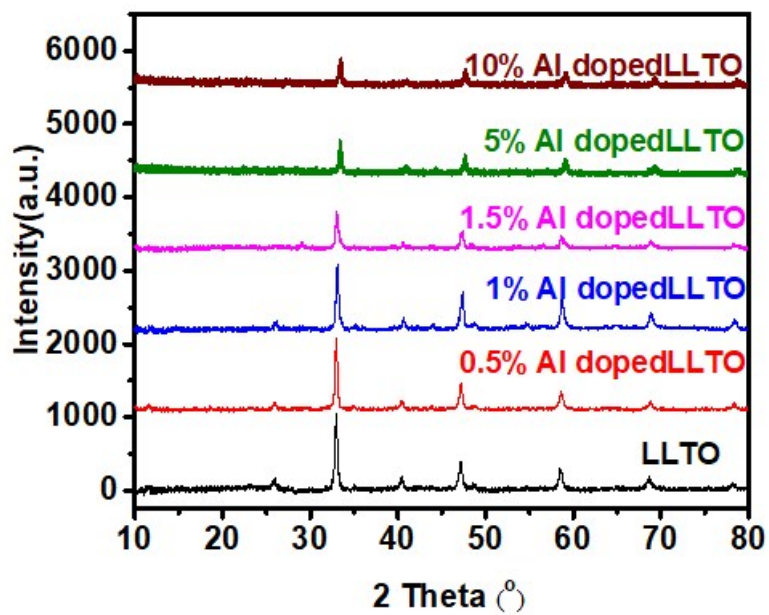

Figure S3. XRD spectra of 0.5-10% Al-doped LLTO nanofibers.

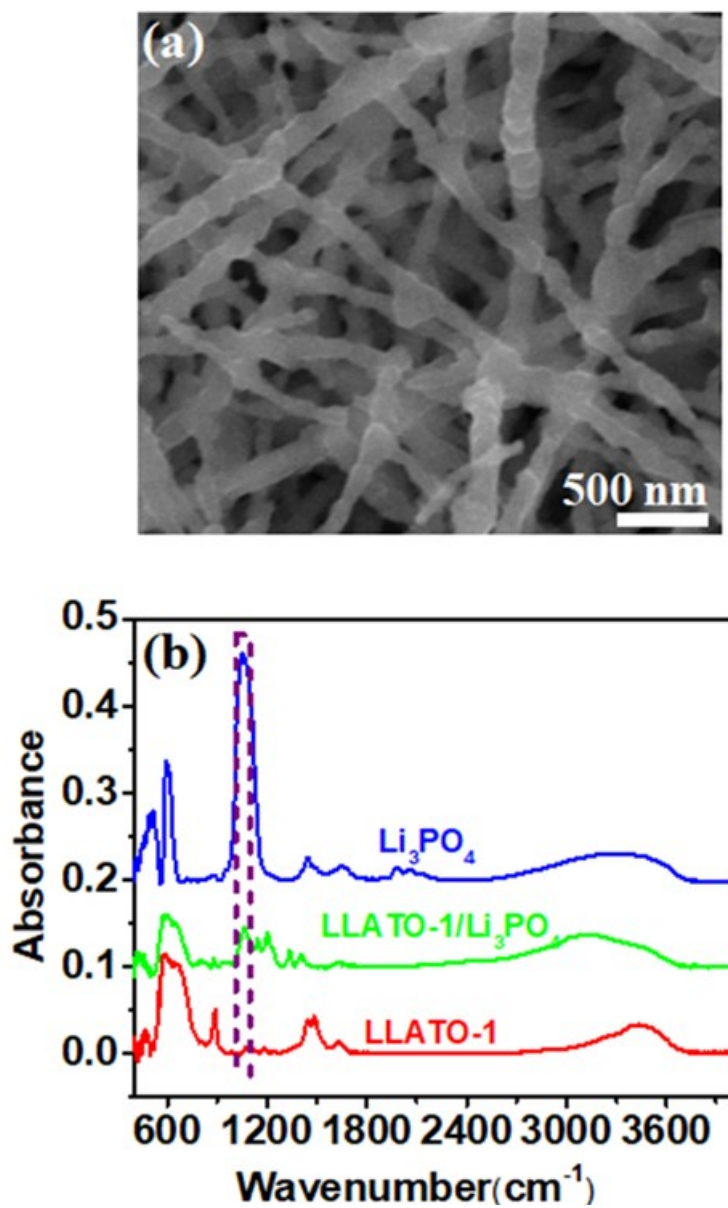

**Figure S4.** (a) SEM images of Li<sub>3</sub>PO<sub>4</sub>-modified LLATO nanofibers, (b) FTIR spectra.

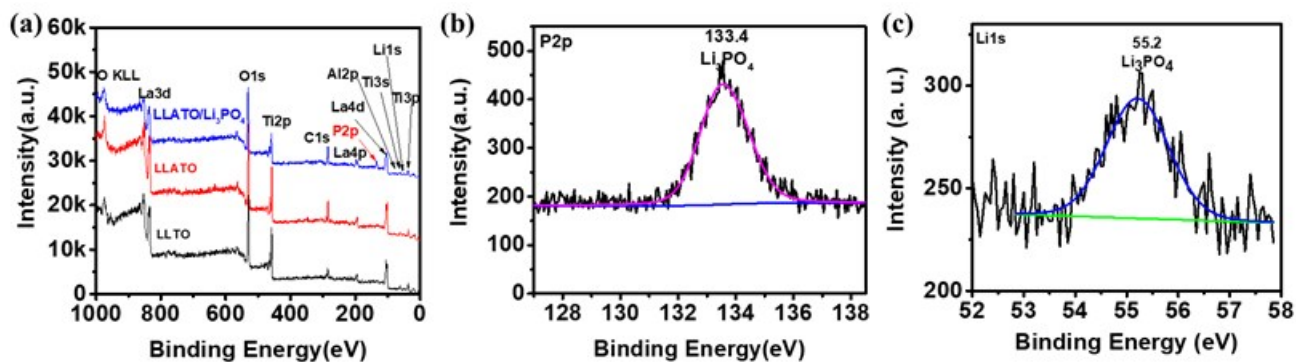

**Figure S5.** (a) XPS survey scan of  $\text{Li}_3\text{PO}_4$ -modified LLATO nanofibers, (b) P 2p core-level spectrum, (c) Li 1s core-level spectrum.

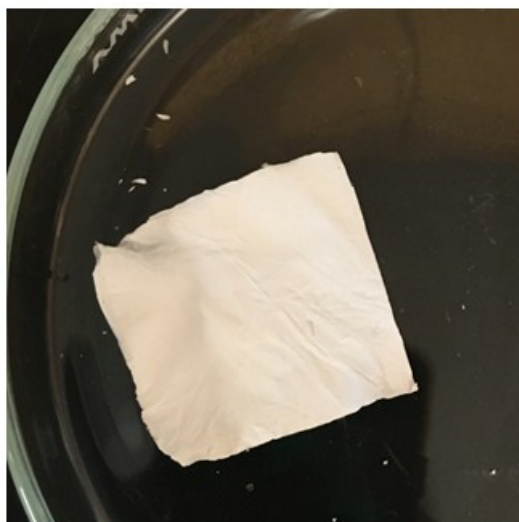

**Figure S6.** Optical image of PVDF-HFP/LiTFSI/LLATO composite electrolyte.

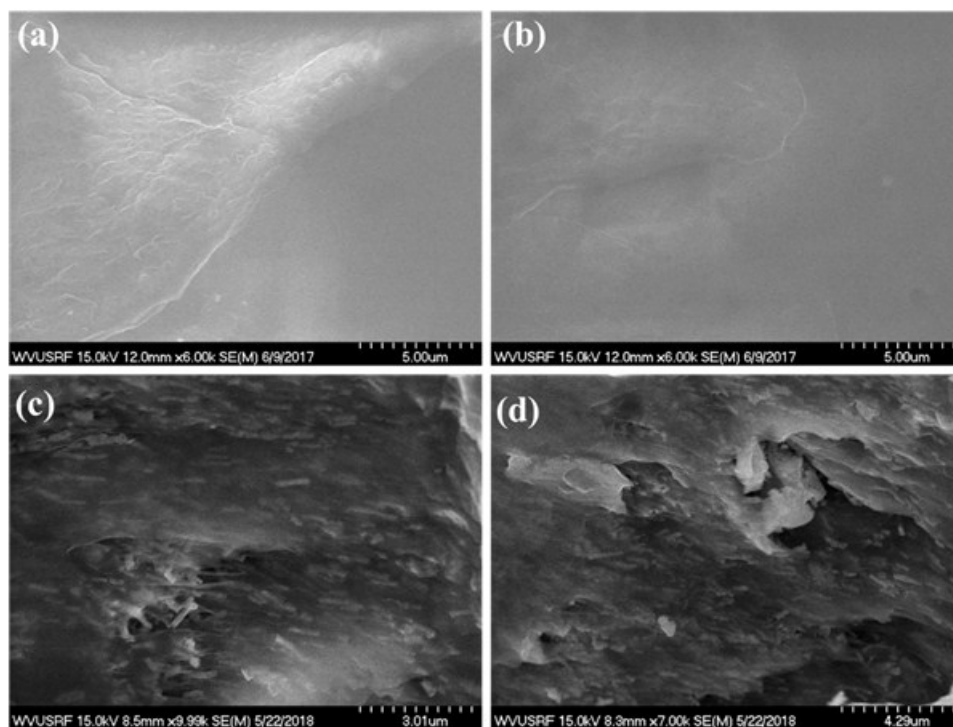

**Figure S7.** SEM images of surface of PVDF-HFP/LiTFSI/LLATO membrane at different spots (a) (b), SEM image of inside of the PVDF-HFP/LiTFSI/LLATO membrane at different spots (c) (d).

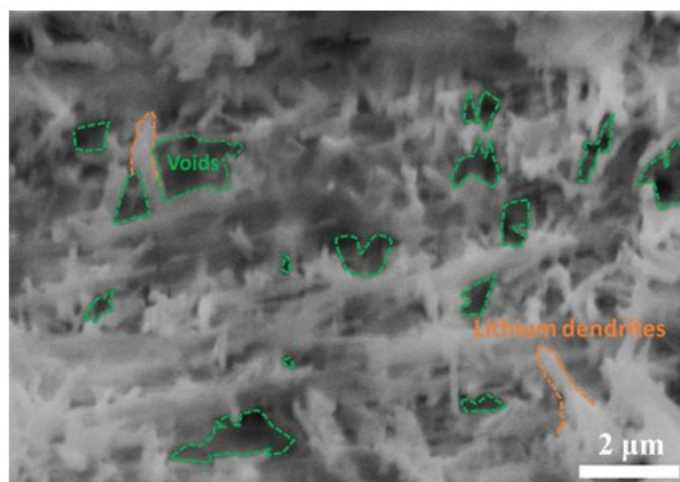

**Figure S8.** SEM image of the PVDF-HFP/LiTFSI0/40%LLATO membrane. The dendrites are grown at a current density of 0.5 mA/cm<sup>2</sup> with areal capacity of 0.25 mAh/cm<sup>2</sup> at room temperature.

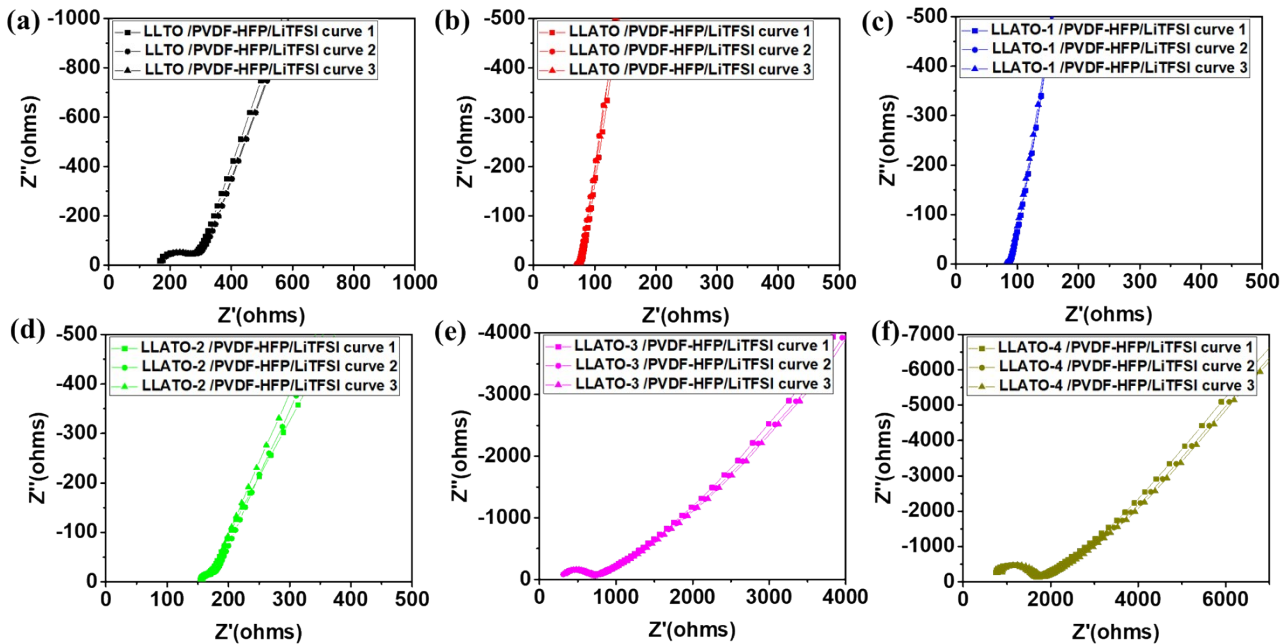

**Figure S9.** EIS plots of composite electrolytes based on LLTO nanofibers with different contents of aluminum doping. (a) LLTO/PVDF-HFP/LiTFSI, (b) LLATO/PVDF-HFP/LiTFSI, (c) LLATO-1/PVDF-HFP/LiTFSI, (d) LLATO-2/PVDF-HFP/LiTFSI, (e) LLATO-3/PVDF-HFP/LiTFSI, (f) LLATO-4/PVDF-HFP/LiTFSI.

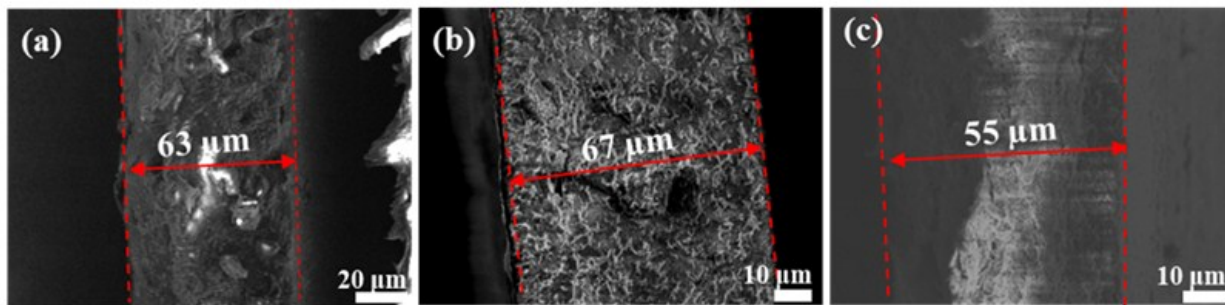

**Figure S10.** Thickness of composite electrolyte membrane for symmetric Li|Electrolyte|Li cell. (a) PVDF-HFP/LiTFSI, (b) PVDF-HFP/LiTFSI/LLATO (c) PVDF-HFP/LiTFSI/LLATO/Li<sub>3</sub>PO<sub>4</sub>.



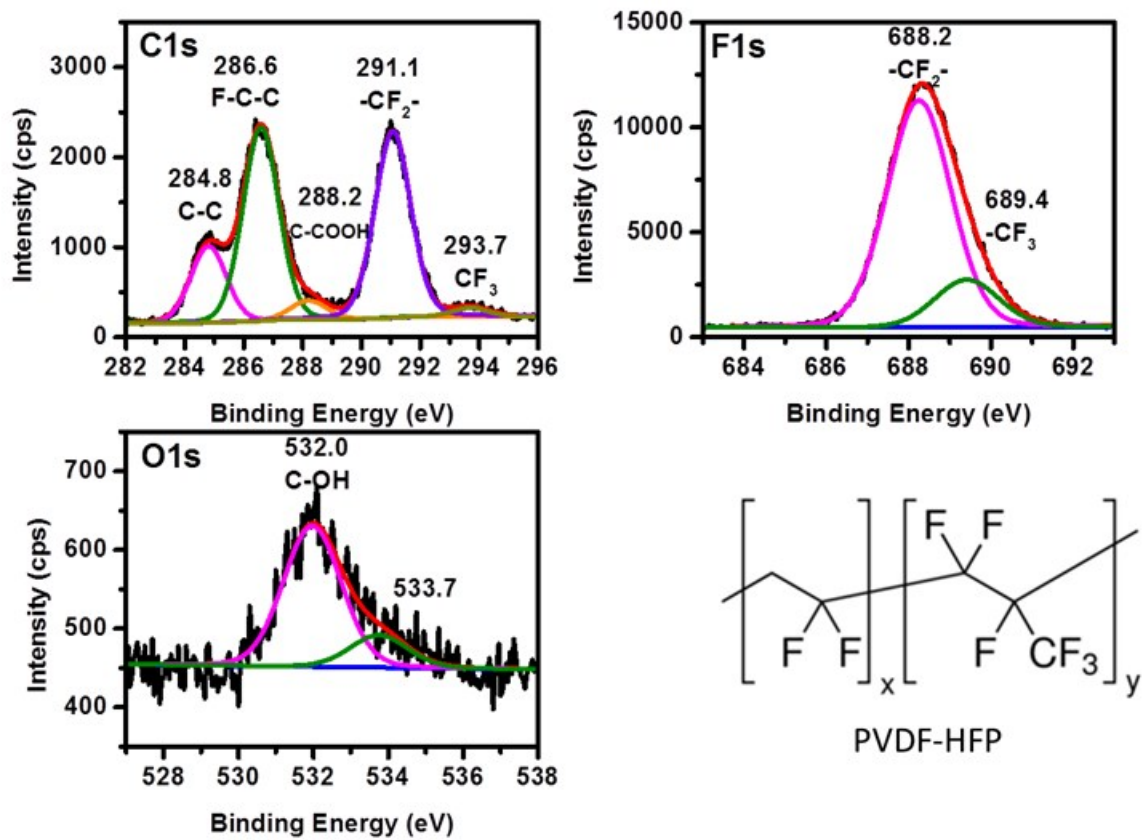

Figure S11. XPS spectra of PVDF-HFP.

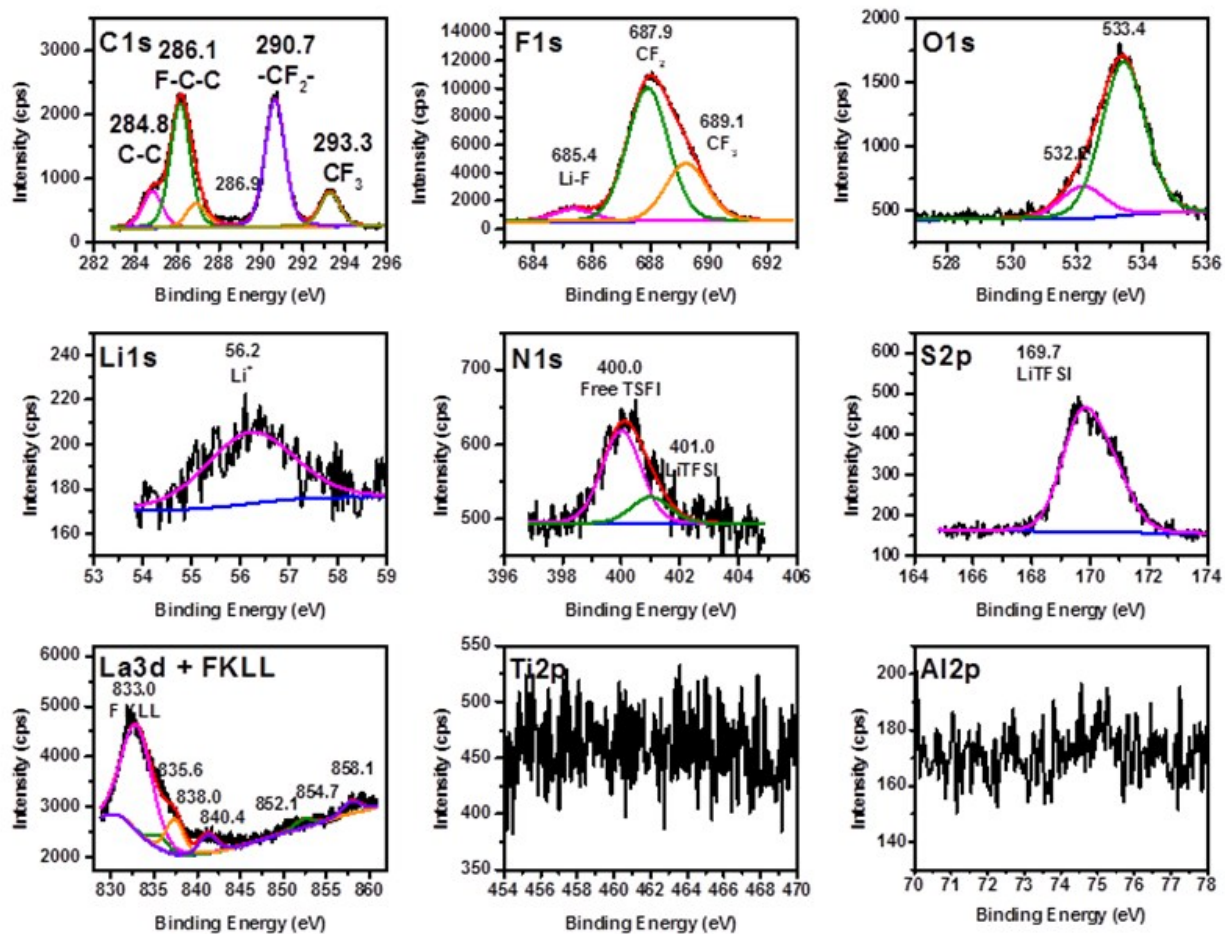

Figure S12. XPS of PVDF-HFP/LiFTSI composite electrolyte.

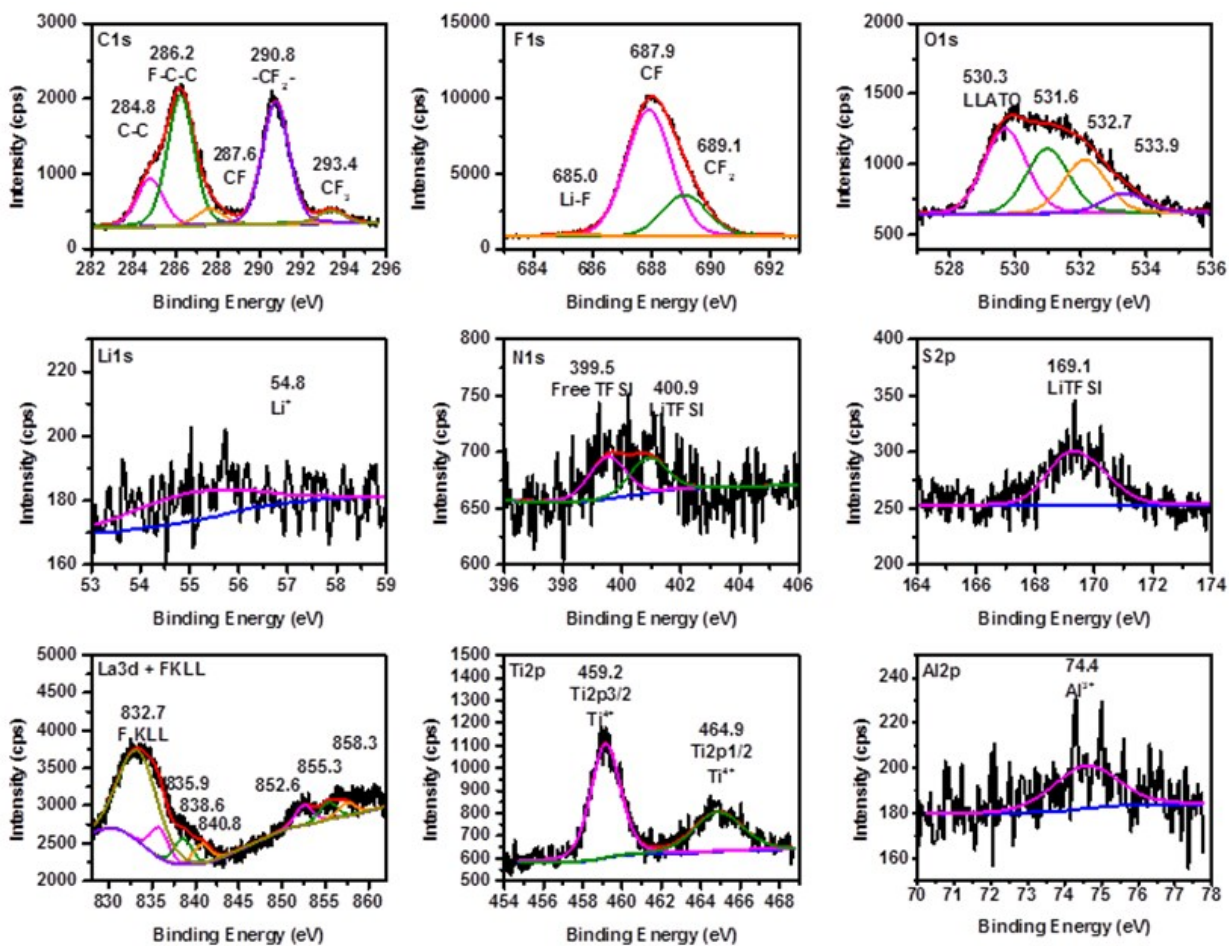

**Figure S13.** XPS of PVDF-HFP/LiTFSI/30%LLATO composite electrolyte.

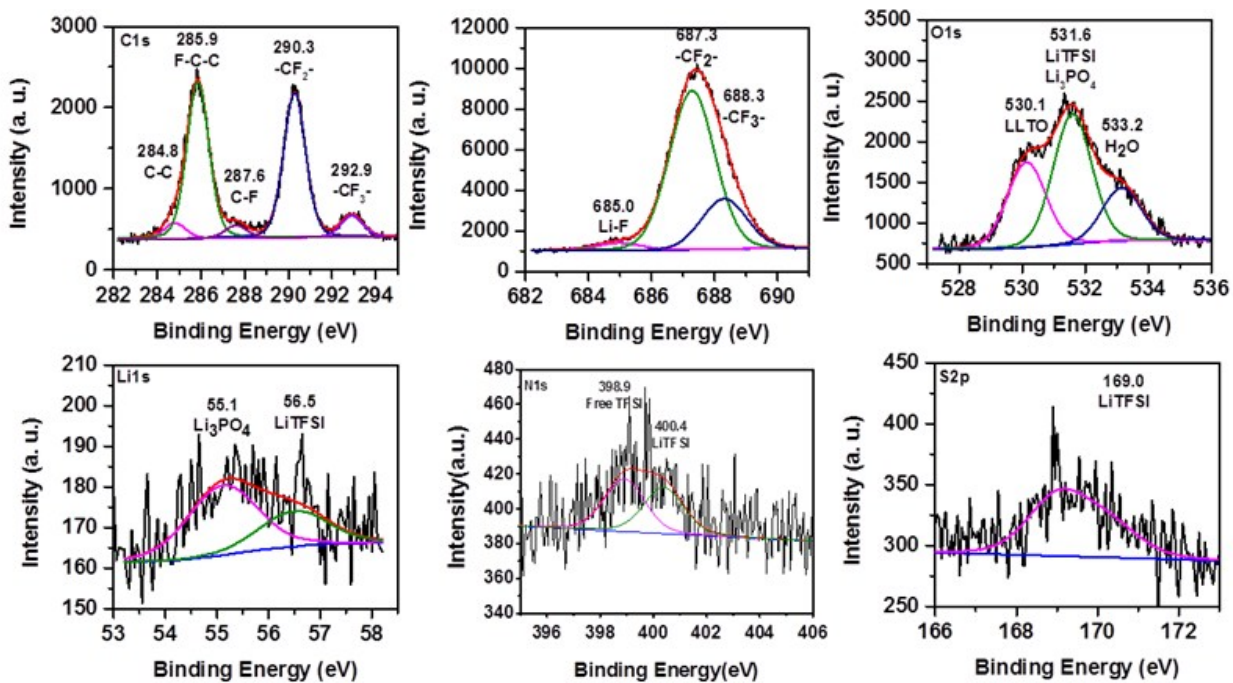

Figure S14. XPS of PVDF-HFP/LiTFSI/30%LLATO/Li<sub>3</sub>PO<sub>4</sub> composite electrolyte.

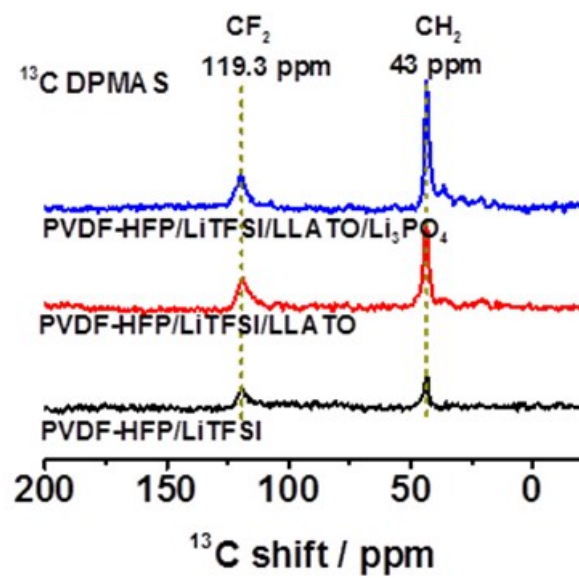

**Figure S15.**  $^{13}\text{C}$  NMR spectra of PVDF-HFP/LiTFSI, PVDF-HFP/LiTFSI/LLATO, and PVDF-HFP/LiTFSI/LLATO/ $\text{Li}_3\text{PO}_4$ .

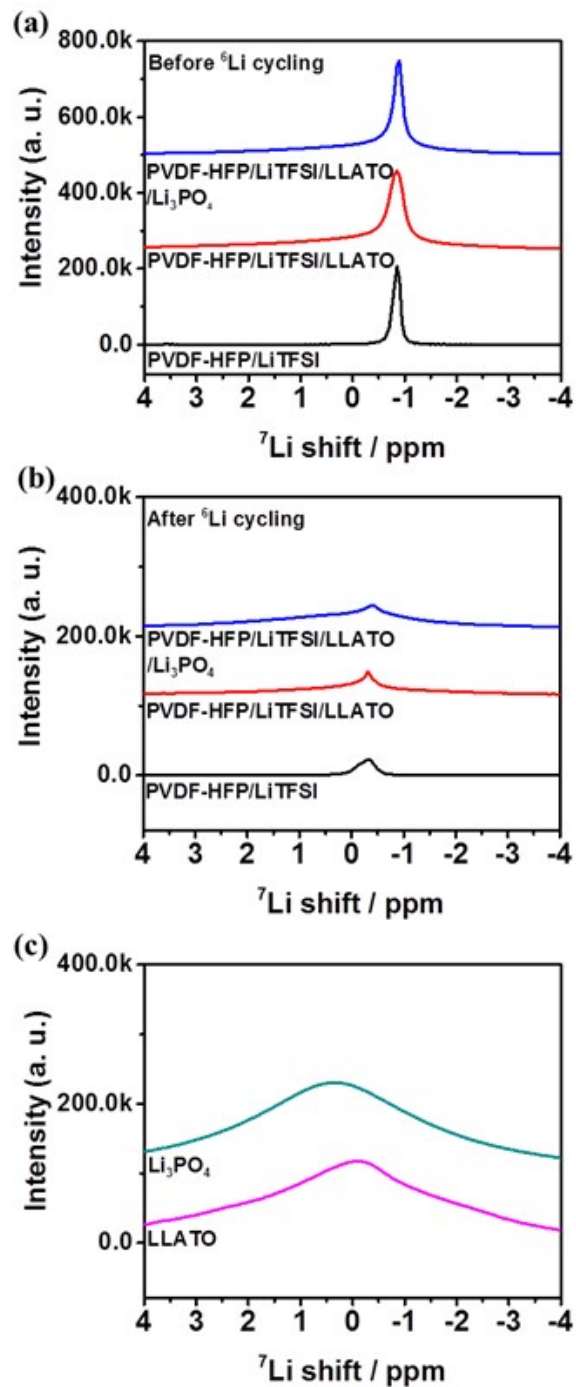

**Figure S16.** (a)  $^7\text{Li}$  NMR spectra of HFP/LiTFSI, PVDF-HFP/LiTFSI/LLATO, and PVDF-HFP/LiTFSI/LLATO/Li<sub>3</sub>PO<sub>4</sub> before  $^6\text{Li}$  cycling, (b)  $^7\text{Li}$  NMR spectra of PVDF-HFP/LiTFSI, PVDF-HFP/LiTFSI/LLATO, and PVDF-HFP/LiTFSI/LLATO/Li<sub>3</sub>PO<sub>4</sub> after  $^6\text{Li}$  cycling, (c)  $^7\text{Li}$  NMR spectra of pure Li<sub>3</sub>PO<sub>4</sub> and LLATO nanofibers.

**Table S1.** Calculated lithium transference numbers.

|                                      | $I_0$<br>( $\mu\text{A}$ ) | $I_{SS}$<br>( $\mu\text{A}$ ) | $R_0$<br>( $\Omega$ ) | $R_{SS}$<br>( $\Omega$ ) | $t_{Li^+}$ |
|--------------------------------------|----------------------------|-------------------------------|-----------------------|--------------------------|------------|
| PVDF-HFP                             | 0.11                       | 0.02                          | 219                   | 1401                     | 0.18       |
| 10%                                  | 2.7                        | 0.9                           | 913                   | 1122                     | 0.28       |
| 20%                                  | 0.15                       | 0.06                          | 903                   | 1192                     | 0.40       |
| 30%                                  | 10.2                       | 4.6                           | 544                   | 553                      | 0.45       |
| 30% +Li <sub>3</sub> PO <sub>4</sub> | 2.7                        | 1.4                           | 281                   | 431                      | 0.46       |

**Table S2.** Spectral simulation, assignment and quantification results of  $^6\text{Li}$  NMR spectra of PVDF-HFP/LiTFSI/LLATO after electrochemical cycling

| <b>PVDF-<br/>HFP/LiTFSI/LLAT<br/>O</b> | <b>ppm</b> | <b>Height</b> | <b>Width(Hz<br/>)</b> | <b>Area</b> | <b>percentage<br/>%</b> |
|----------------------------------------|------------|---------------|-----------------------|-------------|-------------------------|
| LLATO                                  | 2.45       | 35869.68      | 42                    | 795570.1    | 15.1                    |
| LLATO                                  | 2          | 5190.17       | 20                    | 41682.36    | 0.8                     |
| Interface                              | 1.09       | 10980.61      | 76                    | 350630.58   | 6.7                     |
| LLATO                                  | 0.19       | 95125.74      | 42                    | 2185075.1   | 41.5                    |
| LLATO                                  | -0.33      | 68933.26      | 22                    | 807272.44   | 15.3                    |
| LiTFSI                                 | -0.16      | 26581.46      | 20                    | 284079.74   | 5.4                     |
| LLATO                                  | -0.72      | 47379.85      | 31                    | 804413.42   | 15.3                    |



**Table S3.** Spectral simulation, assignment and quantification results of  $^6\text{Li}$  spectra of PVDF-HFP/LiTFSI/LLATO/ $\text{Li}_3\text{PO}_4$  after electrochemical cycling

| <b>PVDF-<br/>HFP/LiTFSI/LLATO/<math>\text{Li}_3\text{PO}_4</math></b> | <b>ppm</b> | <b>Height</b> | <b>Width<br/>(Hz)</b> | <b>Area</b> | <b>percentage<br/>%</b> |
|-----------------------------------------------------------------------|------------|---------------|-----------------------|-------------|-------------------------|
| LLATO                                                                 | 2.44       | 7930.38       | 280                   | 197707.09   | 5.9                     |
| LLATO                                                                 | 1.86       | 7623.13       | 300                   | 198818.29   | 5.9                     |
| Interface                                                             | 1.09       | 11485.77      | 361                   | 388768.91   | 11.5                    |
| $\text{Li}_3\text{PO}_4$                                              | 0.42       | 62709.61      | 140                   | 836839.55   | 24.8                    |
| LLATO                                                                 | 0.11       | 37953.61      | 119                   | 408001.61   | 12.1                    |
| LiTFSI                                                                | -0.13      | 12890.36      | 96                    | 123372.22   | 3.7                     |
| LLATO                                                                 | -0.35      | 43528.1       | 201                   | 869639.91   | 25.8                    |
| LLATO                                                                 | -0.71      | 5604.02       | 109                   | 59247.993   | 1.8                     |
| Decomposed LLATO                                                      | -1.51      | 4682.26       | 626                   | 292631.21   | 8.7                     |
